# Supplementary material
Source: PubMed Central journal article supplement (PMC5059804)
Supplement: supp_tpc.16.00364_TPC2016-00364-RAR2_Supplemental_Data.pdf [file supp_tpc.16.00364_TPC2016-00364-RAR2_Supplemental_Data.pdf]

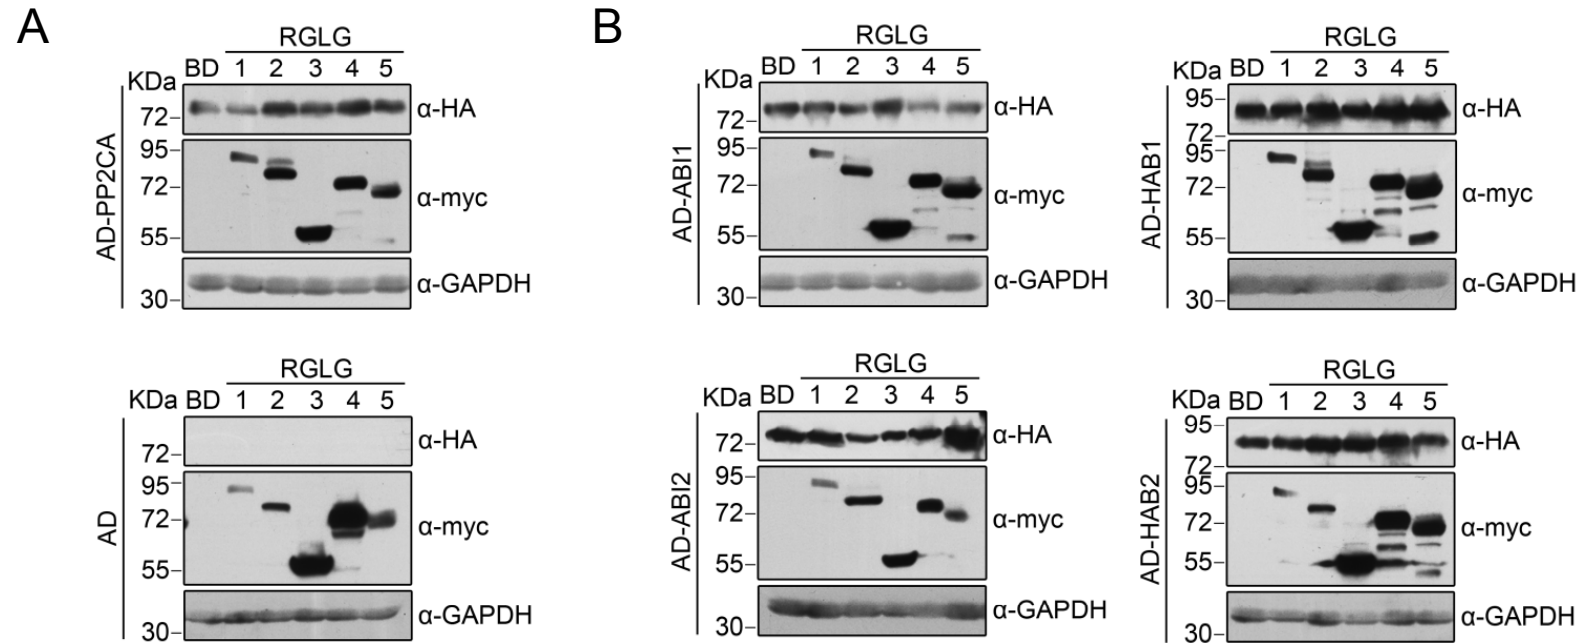

**Supplemental Figure 1.** Immunoblot analysis verifies the expression of the AD-PP2C and BD-RGLG proteins in the Y2H assay.

Total proteins were extracted from the yeast cells for immunoblot analysis.  $\alpha$ -HA was used to detect AD-PP2Cs and  $\alpha$ -myc was used to detect BD-RGLGs. GAPDH was used as a loading control. The RING domain of RGLG3 was deleted to avoid autoactivation and accordingly, its molecular mass is lower than the rest of RGLGs.

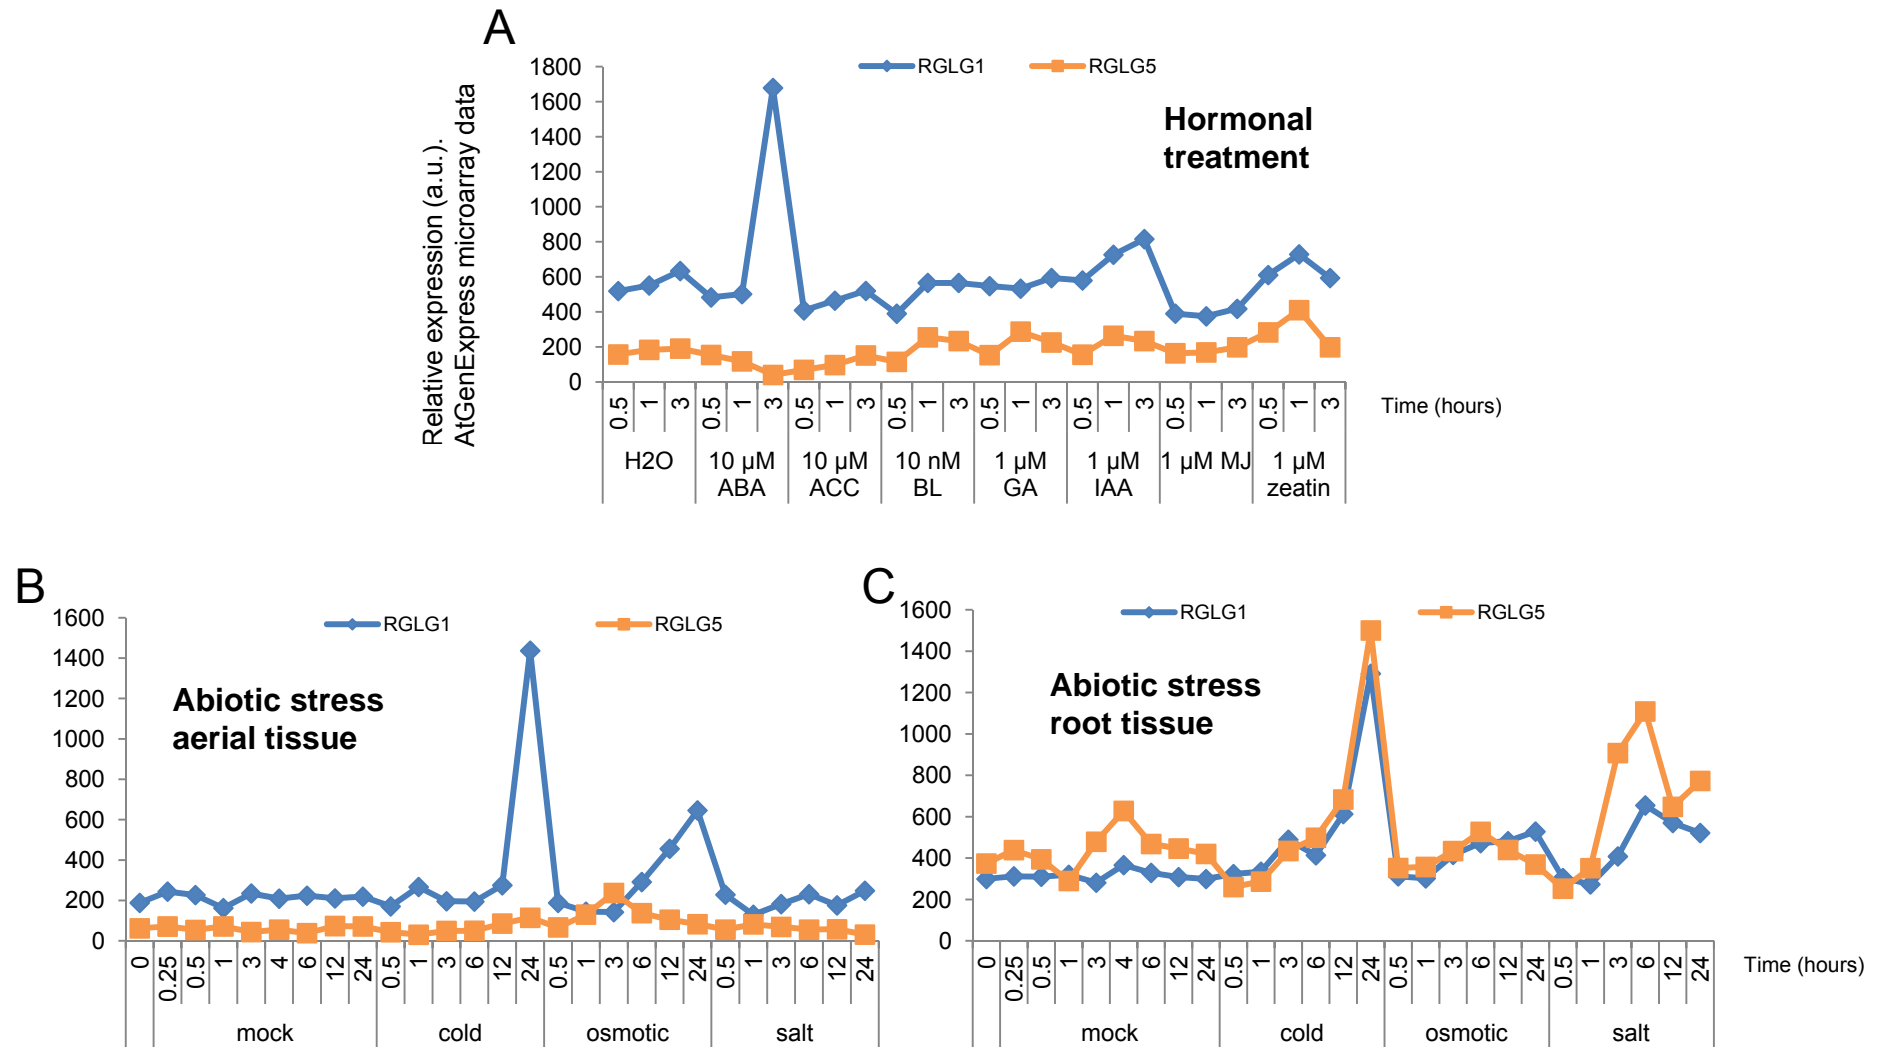

**Supplemental Figure 2.** Relative expression of *RGLG1* and *RGLG5* in seedlings.

Seedlings were treated with different hormones **(A)** or submitted to cold (4°C), osmotic (300 mM mannitol) or salt (150 mM NaCl) stress **(B, C)**. Expression data were obtained from Affymetrix microarrays for Arabidopsis deposited in AtGenExpress public database (Goda et al., 2008) and visualized using the AtGenExpress Visualization Tool located in <http://weigeltworld.org/resources.html>.

**Goda, H., et al., (2008).** The AtGenExpress hormone and chemical treatment data set: experimental design, data evaluation, model data analysis and data access. *Plant J.* **55**, 526-542.

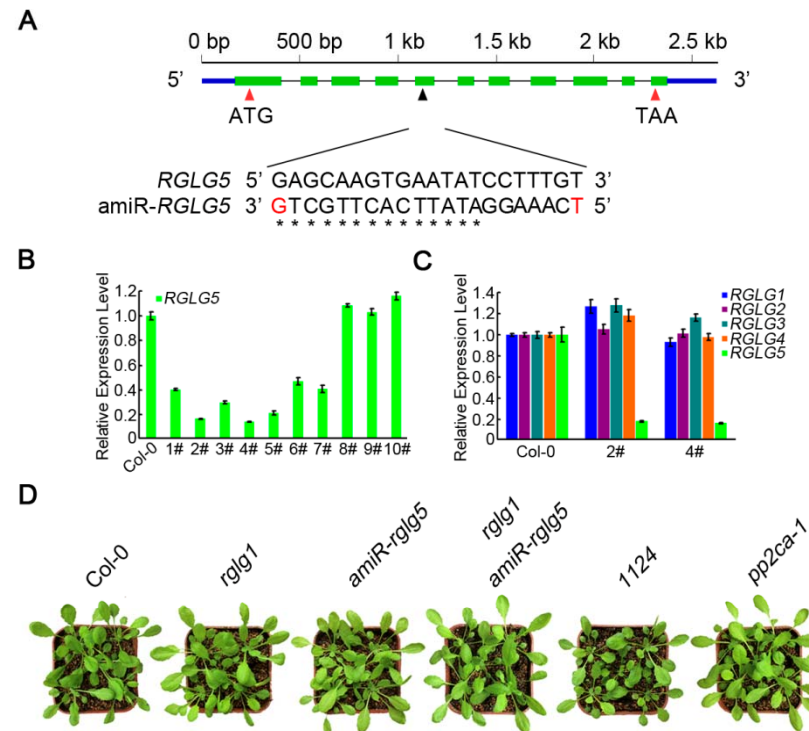

**Supplemental Figure 3.** *RGLG5* transcript levels were reduced in amiRNA transgenic plants compared to wild type.

**(A)** Diagram showing location and target sequence of the designed amiRNA in *RGLG5*.

**(B)** Decreased *RGLG5* transcript level in amiRNA transgenic lines compared to the wild type detected. Four-week-old *Arabidopsis* leaves were used for RNA extraction. Gene expression was examined using RT-qPCR. *UBQ10* was used as the internal control, and expression levels were normalized to that examined in Col-0. Data represent the mean  $\pm$  SD of four technical replicas.

**(C)** Relative expression levels of five *RGLG* genes in selected *RGLG5* amiRNA transgenic lines. No significant effect on other *RGLGs* expression indicates specific downregulation of *RGLG5* in the checked amiRNA transgenic lines, and line 4 (4#) was chosen for use in this work. Four-week-old *Arabidopsis* leaves were used for RNA extraction. Gene expression was examined using RT-qPCR. *UBQ10* was used as the internal control, and expression levels were normalized to that examined in Col-0. Data represent the mean  $\pm$  SD of four technical replicas.

**(D)** Photographs of 4-week-old plants under short-day conditions used in the phenotype analysis.

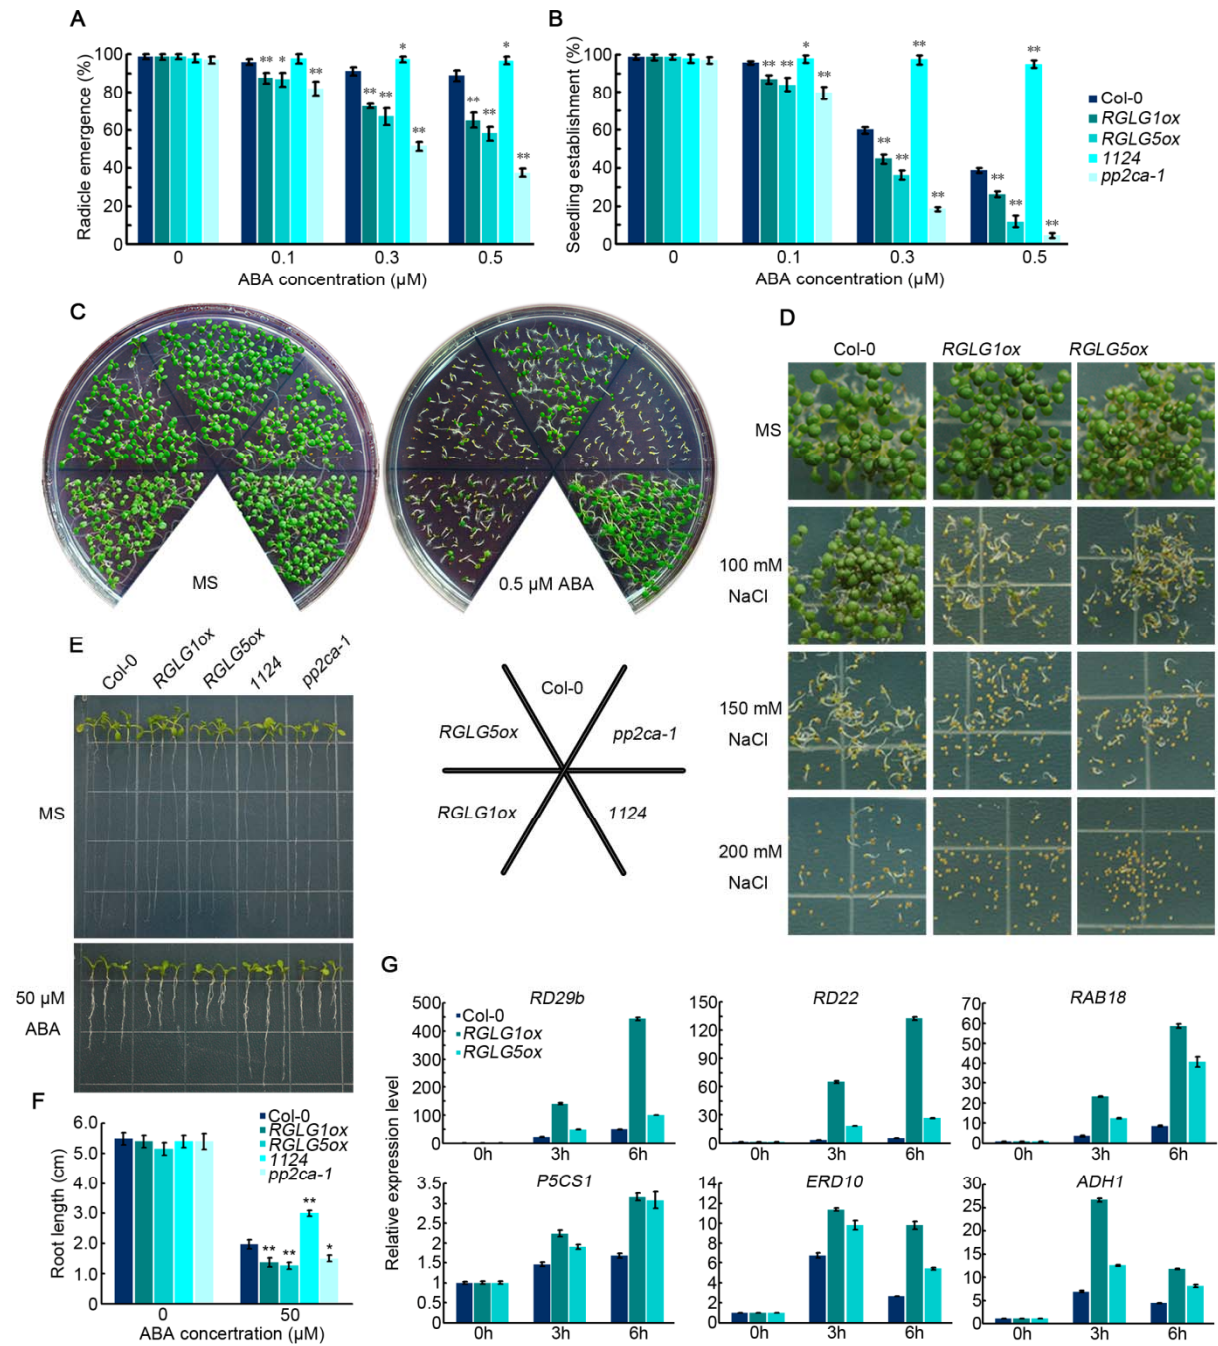

**Supplemental Figure 4.** ABA hypersensitivity in *Arabidopsis* transgenic lines overexpressing (OX) either *RGLG1* or *RGLG5*.

- (A)** Germination (radicle emergence) of wild type (Col-0), transgenic plants overexpressing *RGLG1* or *RGLG5*, 1124 and *pp2ca-1* mutants after 72-h growth on MS plates containing the indicated concentrations of ABA. Bars are SD of three replications. Asterisks indicate a significant difference from wild type (Student's t-test: \*,  $P < 0.05$ ; \*\*,  $P < 0.01$ ).
- (B)** Percentage of seeds that developed fully green expanded cotyledons (seedling establishment) after 7-day growth on MS plates containing the indicated concentrations of ABA. Bars are SD of three replications. Asterisks indicate a significant difference from wild type (Student's t-test: \*,  $P < 0.05$ ; \*\*,  $P < 0.01$ ).
- (C)** Photographs of representative seedlings taken 7 days after sowing on MS plates with or without 0.5  $\mu$ M ABA.
- (D)** Enhanced sensitivity to salt-mediated inhibition of germination and seedling establishment. Germination and postgermination growth of *Arabidopsis* transgenic lines overexpressing *RGLG1* or *RGLG5* compared to Col-0 wt. Seeds were sown on MS plates containing the indicated concentrations of NaCl and photographs were taken after 7 days.
- (E)** Enhanced ABA-mediated inhibition of primary root growth in *RGLG1* or *RGLG5* OX seedlings compared to the wild type. Photographs were taken 10 days after transferring 5-day-old seedlings to MS plates supplemented without or with 50  $\mu$ M ABA.
- (F)** Root length quantification of previous experiment. Bars indicate mean  $\pm$  SD of thirty seedlings. Asterisks indicate a significant difference from wild type (Student's t-test: \*,  $P < 0.05$ ; \*\*,  $P < 0.01$ ).
- (G)** Enhanced induction of ABA-responsive genes is observed in *Arabidopsis* transgenic lines overexpressing either *RGLG1* or *RGLG5*. 7-day-old *Arabidopsis* seedlings were transferred to liquid MS medium containing 50  $\mu$ M ABA and sampled at the indicated time points. Gene expression was examined using RT-qPCR. *UBQ10* was used as the internal control, and expression levels were normalized to that examined at time point 0 h. Data represent the mean  $\pm$  SD of four technical replicates.

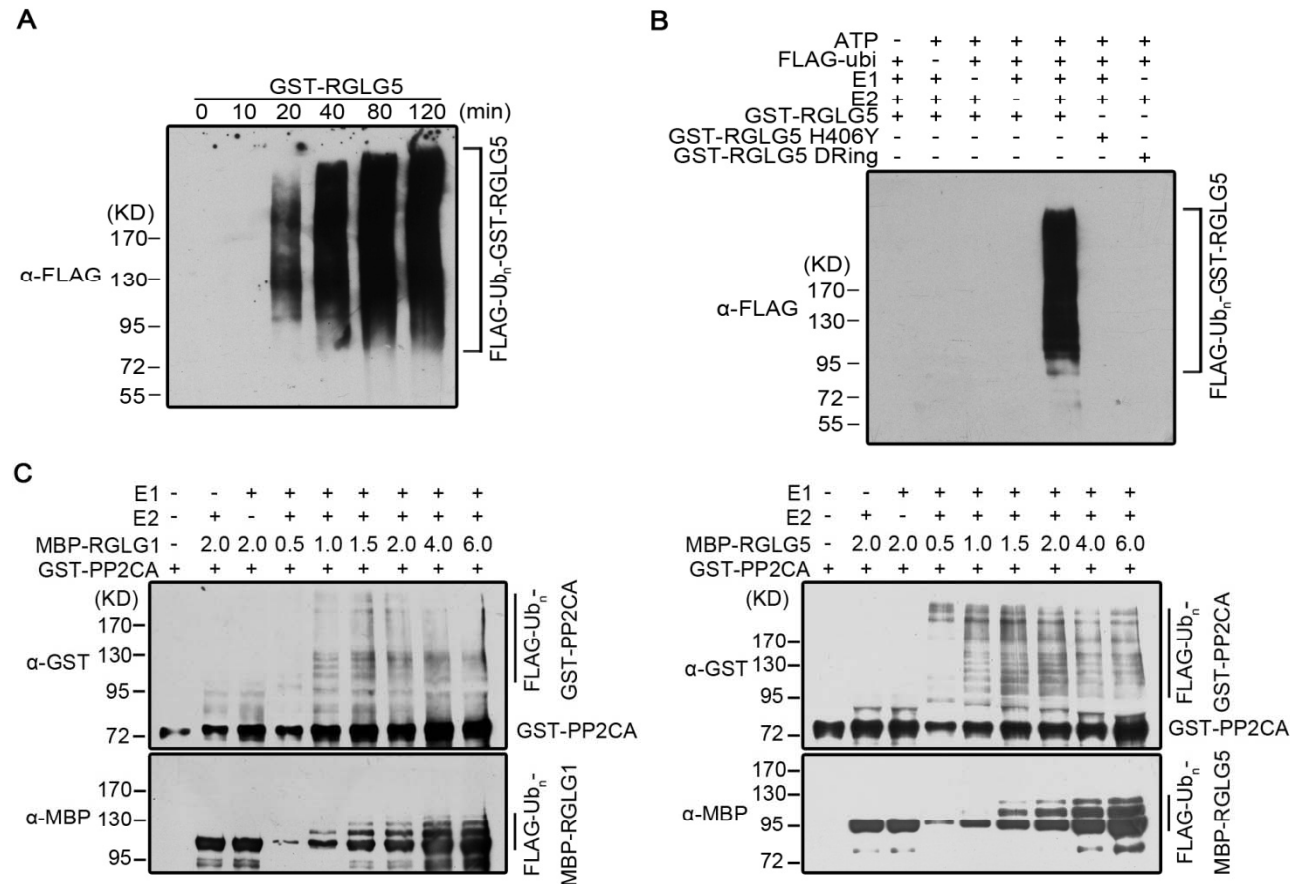

**Supplemental Figure 5.** E3 ligase activity of RGLG5 and *in vitro* ubiquitination of PP2CA by RGLG1 and RGLG5.

**(A)** Self-ubiquitination of GST-RGLG5 indicating ubiquitin ligase activity of RGLG5. The ubiquitination assay was performed in the presence of E1, E2, ATP and FLAG-ubiquitin, and sampled at the indicated time points. Ubiquitinated bands were detected using FLAG antibody.

**(B)** Loss of ubiquitination activities of GST-RGLG5 by deleting or mutating its RING-domain. Ubiquitination assay was carried out as in **(A)**. FLAG antibody was used to detect the ubiquitinated bands.

**(C)** *In vitro* ubiquitination of PP2CA by RGLG1 (left) and RGLG5 (right). Purified GST-PP2CA was incubated with ATP, FLAG-Ubiquitin, E1, E2 and serial concentrations of MBP-RGLG1 or RGLG5. The ubiquitinated products were examined by anti-GST or anti-MBP antibodies. IB using anti-MBP detects self-ubiquitination of MBP-RGLG1 and MBP-RGLG5.

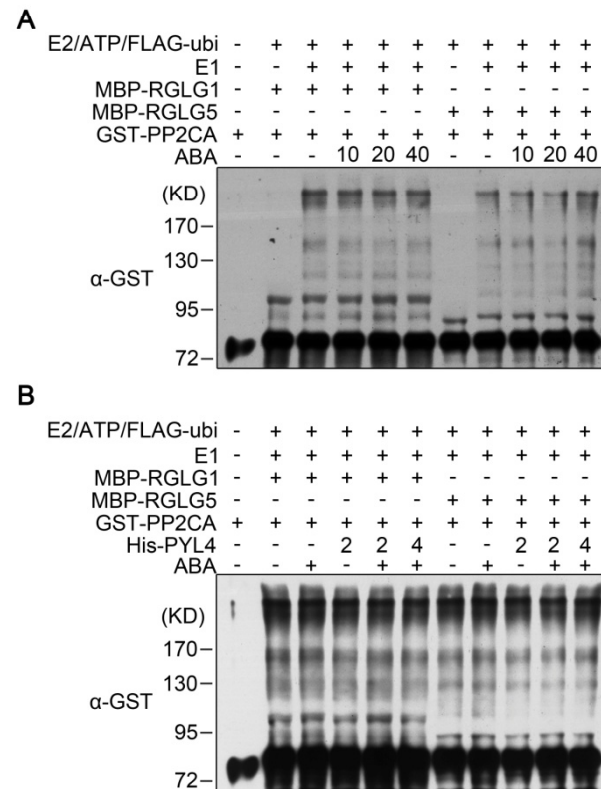

**Supplemental Figure 6.** *In vitro* ubiquitination of PP2CA by RGLG1 and RGLG5 is not affected by ABA and PYL4.

**(A)** *In vitro* ubiquitination of PP2CA in the presence of serial concentrations of ABA. Ubiquitination assay was performed as described in **Figure 5A**. 10, 20 and 40  $\mu$ M ABA was added together with other reaction components, respectively. The ubiquitination of PP2CA was analyzed by western blot using anti-GST antibody.

**(B)** *In vitro* ubiquitination of PP2CA in the presence of ABA, PYL4 or both. The ubiquitination level of PP2CA was not influenced by addition of 10  $\mu$ M ABA, PYL4 or ABA plus serial concentrations of PYL4, respectively.

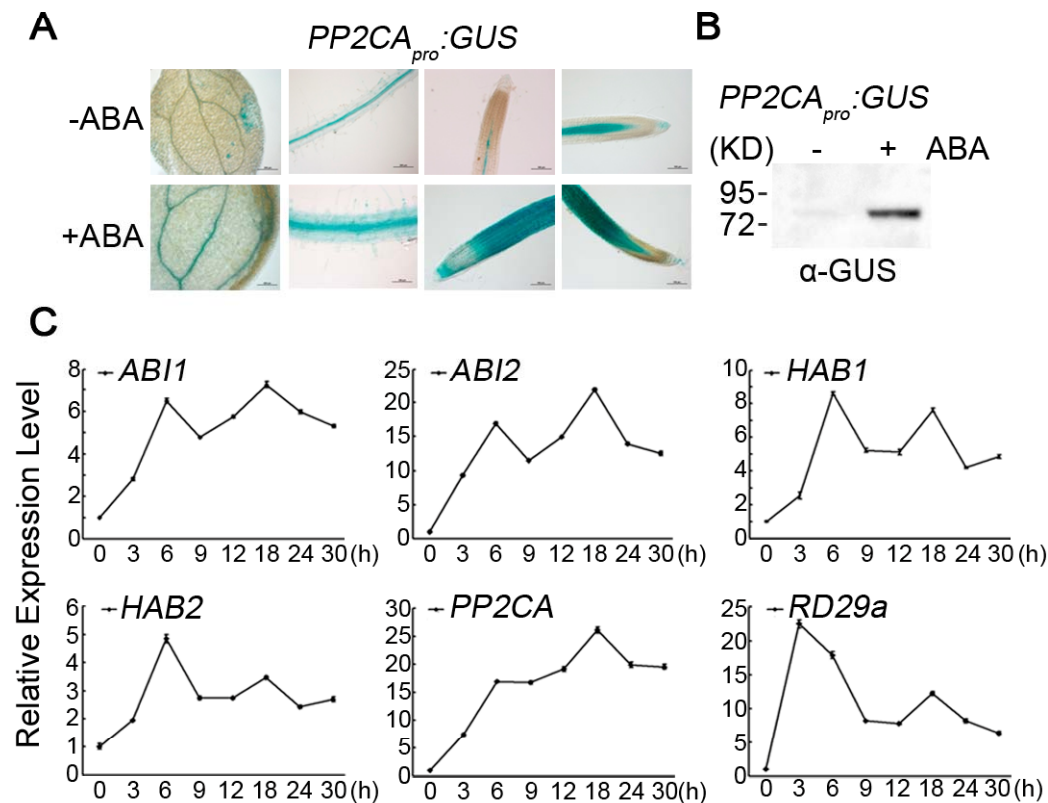

**Supplemental Figure 7.** Expression of the *PP2CA* promoter is strongly induced by ABA.

**(A)** Photographs showing GUS expression driven by *PP2CA<sub>pro</sub>* in roots and cotyledons of 5-d-old seedlings. ABA treatment (10 μM for 3 h) strongly induces expression of GUS.

**(B)** Immunoblot analysis using anti-GUS antibody was performed to quantify GUS protein levels.

**(C)** Transcriptional profiles of *PP2C* genes in response to ABA. Seven-day-old *Arabidopsis* seedlings were transferred in liquid MS medium containing 50 μM ABA and sampled at the indicated time points. Gene expression was examined using RT-qPCR. ABA-responsive *RD29a* expression indicated the effectiveness of ABA treatment. *UBQ10* was used as the internal control, and expression levels of the indicated transcripts were normalized to those measured at time point 0. Data represent the mean ± SD of four technical replicates.

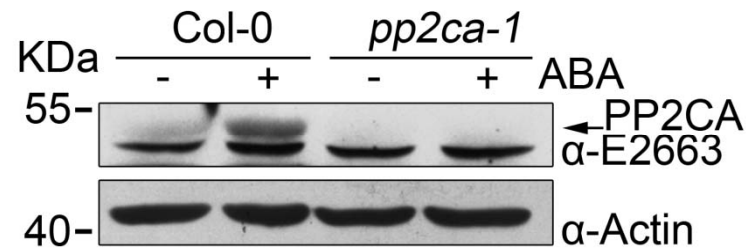

**Supplemental Figure 8.** α-E2663 is a specific antibody for PP2CA.

2-week-old Col-0 and *pp2ca-1* etiolated seedlings were treated without (-) or with (+) 50 μM ABA for 6 h in darkness. Then total proteins were extracted and equal amounts of each treatment were subjected to western blot analysis. α-E2663 was used to detect endogenous PP2CA with a dilution of 1:3500. α-Actin was analyzed as a loading control. Endogenous PP2CA (arrow) was detected in Col-0 and it was markedly induced by ABA treatment, whereas it was absent in *pp2ca-1* mutant (-/+ABA).

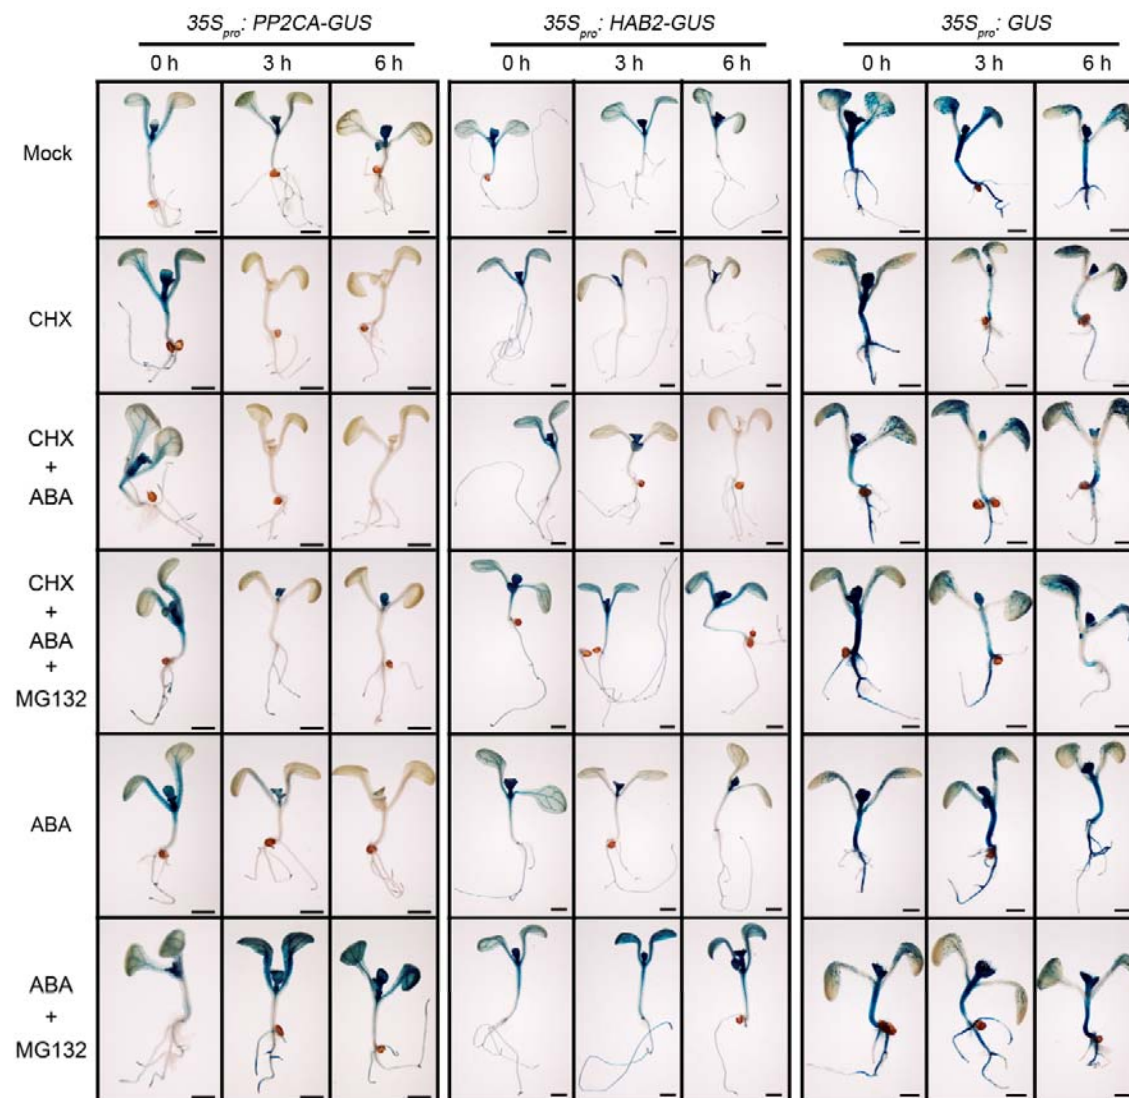

**Supplemental Figure 9.** GUS staining of seedlings expressing PP2CA-GUS or HAB2-GUS reveals ABA-induced degradation of the phosphatases via the 26S proteasome pathway.

Representative photographs of transgenic *Arabidopsis* seedlings constitutively expressing PP2CA-GUS, HAB2-GUS or GUS (negative control). For drug treatment, 7-day-old seedlings were transferred to liquid MS medium supplemented without (Mock) or with 100  $\mu$ M CHX, 50  $\mu$ M ABA, or the indicated combinations lacking or containing 50  $\mu$ M MG132. Samples were taken at the indicated time points after treatment and subjected to GUS staining. Bars = 1 mm.

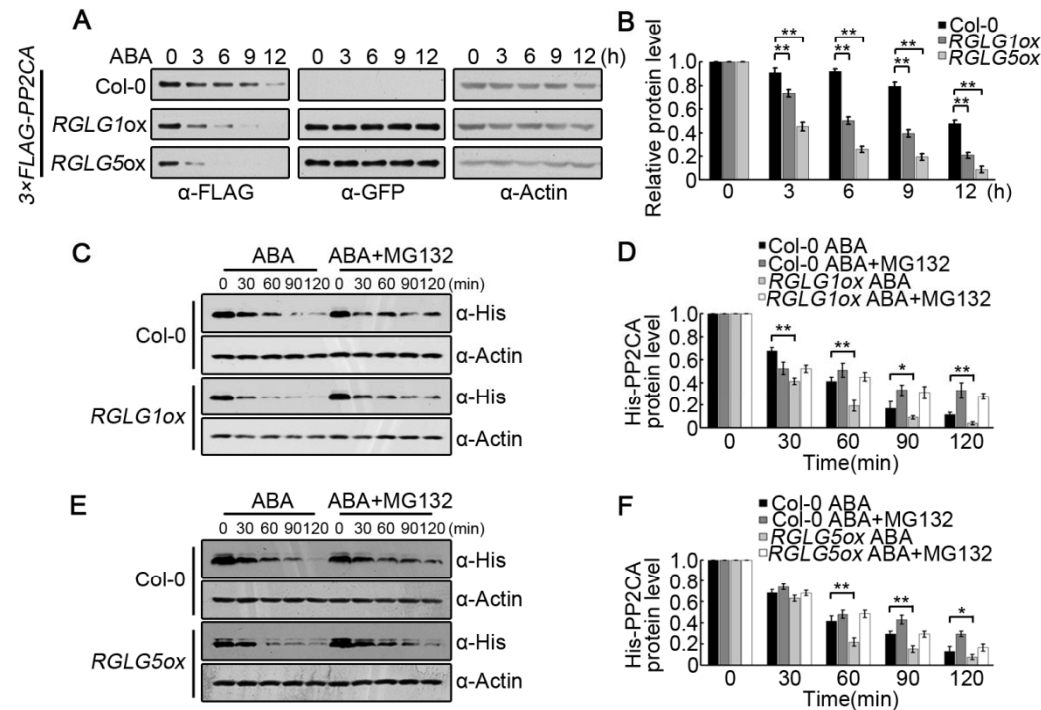

**Supplemental Figure 10.** Overexpression of *RGLG1* or *RGLG5* enhances ABA-promoted degradation of FLAG-PP2CA. ABA-promoted degradation of His-PP2CA in cell-free assays is enhanced in protein extracts prepared from *RGLG1* or *RGLG5* overexpressing plants.

**(A)** FLAG-PP2CA protein dynamics in Col-0 versus *RGLG1* or *RGLG5* overexpressing (ox) backgrounds in response to ABA. Assays were performed as described in **Figure 7C**.

**(B)** The signal intensity in **(A)** was measured by Image J software. The relative protein levels of FLAG-PP2CA in different genetic backgrounds at time point 0 h were set as “1”. Bars indicate the mean  $\pm$  SD from three replications. Student’s t tests were used to determine significant levels of the indicated comparisons. \*\*,  $P < 0.01$ ; \*,  $P < 0.05$ .

**(C)** *In vitro* cell-free degradation of PP2CA in Col-0 versus *RGLG1ox* extracts. Purified His-PP2CA was incubated for the indicated time period in the presence of ABA or ABA+MG132 with protein extracts prepared from 7-day-old wild type (Col-0) or *RGLG1ox* seedlings. Actin was analyzed as a loading control.

**(D)** Three-independent experiments as in **(C)** were performed and the signal intensity was determined by Image J software. The protein levels of His-PP2CA at 0 min were defined as 1. Bars indicate SD calculated from three replicates.

**(E)** *In vitro* cell-free degradation of PP2CA in Col-0 versus *RGLG5ox* extracts. Assays were performed as in **(C)**.

**(F)** Three-independent experiments as in **(E)** were performed and the signal intensity was determined by Image J software. Bars indicate SD calculated from three replicates.

| Treatment         | Protein name | Peptides identified by MS | Peptide score/ p |
|-------------------|--------------|---------------------------|------------------|
| Mock              | PP2CA        | VLGVLAMSR                 | 45.56/0.00017    |
|                   |              | VLGVLAMSR                 | 44.05/0.00024    |
|                   |              | VLGVLAMSR                 | 40.57/0.00053    |
|                   |              | VIYWDGAR                  | 34.86/0.0027     |
|                   |              | RLDLLPSIK                 | 27.61/0.0049     |
|                   |              | QSSDNVSVVVVDLR            | 29.04/0.012      |
|                   |              | QSSDNVSVVVVDLR            | 26.91/0.02       |
|                   |              | QSSDNVSVVVVDLR            | 52.89/5.80E-05   |
| ABA<br>+<br>MG132 | PP2CA        | VLGVLAMSR                 | 53.72/2.60E-05   |
|                   |              | VLGVLAMSR                 | 52.81/3.20E-05   |
|                   |              | VLGVLAMSR                 | 40.73/0.00081    |
|                   |              | VIYWDGAR                  | 31.8/0.0055      |
|                   |              | RLDLLPSIK                 | 30.99/0.0022     |
|                   |              | RLDLLPSIK                 | 33.59/0.0012     |
|                   |              | ECNLVVGATR                | 48.42/8.80E-05   |
|                   |              | IVADSAVAPLENCR            | 56.49/2.30E-05   |
|                   |              | QSSDNVSVVVVDLRK           | 23.53/0.035      |
|                   |              | DMEDAVSIHPSFLQR           | 44.75/0.00015    |
|                   | RGLG1        | DMEDAVSIHPSFLQR           | 27.49/0.0089     |
|                   |              | MDKEVSQRECNLVVGATR        | 26.01/0.017      |
|                   |              | GAGAGDDSDAAHNACSDAALLLTK  | 37.14/0.00079    |
|                   |              | GAGAGDDSDAAHNACSDAALLLTK  | 69.76/4.90E-07   |
|                   |              | IPNFEPSVPPYPFESK          | 24.87/0.026      |
|                   |              | IPNFEPSVPPYPFESK          | 37.65/0.0014     |
|                   |              | IPNFEPSVPPYPFESK          | 22.6/0.042       |
|                   |              | IPNFEPSVPPYPFESK          | 36.16/0.0019     |
|                   |              | ISDNYSSLLQVSEALGR         | 57.76/1.40E-05   |

**Supplemental Table 1.** List of peptides identified for PP2CA and RGLG1 in anti-FLAG immunoprecipitates obtained from 35S<sub>pro</sub>:3xFLAG-PP2CA *Arabidopsis* seedlings mock-treated or treated with ABA and MG132. For mock treatment, two-week-old seedlings were transferred to liquid MS medium for 30 h. For MG and ABA treatment, 50  $\mu$ M MG132 was added for 24 h and then 50  $\mu$ M ABA was added for additional 6 h.
